# Supplementary material for: Effects of Tylosin, a Direct-Fed Microbial and Feedlot Pen Environment on Phenotypic Resistance among Enterococci Isolated from Beef Cattle Feces
Source: MDPI journal article supplement (doi:10.3390/antibiotics11010106), 2022-01-14
Supplement: s1 [file s1]

|                           | #<br>Resistant<br>(of 693<br>tested) | %<br>Resistant | 95%<br>Confidence<br>Interval |       | <0.015 | 0.015 | 0.03  | 0.06 | 0.125 | 0.25  | 0.5   | 1     | 2     | 4     | 8     | 16    | 32    | 64    | 128   | 256   | 512   | 1024  | 2048 | >2048 |
|---------------------------|--------------------------------------|----------------|-------------------------------|-------|--------|-------|-------|------|-------|-------|-------|-------|-------|-------|-------|-------|-------|-------|-------|-------|-------|-------|------|-------|
| Chloramphenicol           | 2                                    | 0.3            | 0.03                          | 1.0   |        |       |       |      |       |       |       |       | 1.73  | 65.22 | 32.32 | 0.435 | 0.145 | 0.145 |       |       |       |       |      |       |
| Ciprofloxacin             | 22                                   | 3.2            | 2                             | 4.8   |        |       |       | 0.58 | 7.94  | 47.04 | 30.45 | 10.82 | 3.03  | 0.145 |       |       |       |       |       |       |       |       |      |       |
| Daptamycin                | 124                                  | 17.9           | 15.1                          | 21.0  |        |       |       |      | 0.87  | 0.43  | 2.45  | 13.85 | 64.5  | 16.88 | 0.575 | 0.435 |       |       |       |       |       |       |      |       |
| Erythromycin              | 80                                   | 11.5           | 9.26                          | 14.2  |        |       |       |      | 48.92 | 24.1  | 2.16  | 5.19  | 8.18  | 4.04  | 7.5   |       |       |       |       |       |       |       |      |       |
| Gentamicin                | 0                                    | 0.0            | 0                             | 0.53* |        |       |       |      |       |       |       |       |       |       |       |       |       |       | 100   |       |       |       |      |       |
| Kanamycin                 | 3                                    | 0.4            | 0.09                          | 1.3   |        |       |       |      |       |       |       |       |       |       |       |       |       |       | 83.26 | 14.43 | 1.88  | 0.435 |      |       |
| Lincomycin                | 413                                  | 59.6           | 55.8                          | 63.3  |        |       |       |      |       |       | 35.96 | 2.45  | 2.02  | 11.43 | 48.2  |       |       |       |       |       |       |       |      |       |
| Linezolid                 | 0                                    | 0.0            | 0                             | 0.53* |        |       |       |      | 0.87  | 3.75  | 76.48 | 18.9  |       |       |       |       |       |       |       |       |       |       |      |       |
| Nitrofurantoin            | 141                                  | 20.4           | 17.4                          | 23.5  |        |       |       |      |       |       |       | 1.3   | 0.29  | 0.435 | 18.9  | 28.72 | 30.01 | 20.35 |       |       |       |       |      |       |
| Penicillin                | 20                                   | 2.9            | 1.77                          | 4.4   |        |       |       |      | 7.79  | 4.18  | 16.88 | 40.12 | 25.69 | 2.45  | 2.89  |       |       |       |       |       |       |       |      |       |
| Streptomycin              | 1                                    | 0.1            | 0                             | 0.8   |        |       |       |      |       |       |       |       |       |       |       |       |       |       |       |       | 99.86 | 0.145 |      |       |
| Quinupristin/Dalfopristin | 57                                   | 8.2            | 6.29                          | 10.5  |        |       |       |      | 39.25 | 5.05  | 47.47 | 7.94  | 0.145 | 0.145 |       |       |       |       |       |       |       |       |      |       |
| Tetracycline              | 508                                  | 73.3           | 69.8                          | 76.6  |        |       |       |      |       |       | 22.37 | 1.88  | 0.87  | 1.59  | 3.17  | 18.04 | 52.09 |       |       |       |       |       |      |       |
| Tigecycline               | 0                                    | 0.0            | 0                             | 0.53* |        | 0.58  | 17.75 | 26.7 | 53.1  | 1.88  |       |       |       |       |       |       |       |       |       |       |       |       |      |       |
| Tylosin                   | 60                                   | 8.7            | 6.67                          | 11.0  |        |       |       |      | 0.435 | 0.72  | 8.51  | 61.33 | 13.28 | 5.77  | 1.3   | 1.01  | 7.65  |       |       |       |       |       |      |       |
| Vancomycin                | 0                                    | 0.0            | 0                             | 0.53* |        |       |       |      | 0.87  | 52.38 | 44.73 | 0.72  | 1.3   |       |       |       |       |       |       |       |       |       |      |       |
| *97.5% One-sided CI       |                                      |                |                               |       |        |       |       |      |       |       |       |       |       |       |       |       |       |       |       |       |       |       |      |       |

**Supplemental Table S1.** Percentage of *Enterococcus* spp. isolates that were resistant and their distribution across minimum inhibitory concentrations (MIC) for each antibiotic. Black vertical lines indicate the human CLSI (or, NARMS) interpretive breakpoint, grey boxes indicate areas above and below the highest and lowest limits of the assay antibiotic concentrations, respectively. Isolates which exceeded growth at the highest antibiotic concentration were placed in the next MIC column (shown in the grey area).
